# Supplementary material
Source: PubMed Central journal article supplement (PMC8344101)
Supplement: NIHMS1728129-supplement-Appendix.pdf [file NIHMS1728129-supplement-Appendix.pdf]

## Appendix 1:

The 4 outcome groups (fall, non-fall, skate-over, and walk-over) were not independent due to the nature of our study. In order to verify whether the four slip conditions are independent from each other regardless of whether the individuals are the same or different. Paired and independent t-tests were conducted to compare differences in the studied variables between different slip outcomes which involved the same participants. For the same participants in different groups, paired t-test was used, while for different participants in different groups, independent t-test was used.

The participants chosen to study fall were completely independent from those chosen to study non-fall, and the participants chosen to study walk-over were completely independent from those chosen to study skate-over. Therefore, these two pairs of comparisons meet the requirement of independence. However, the other comparisons did involve some of the same participants to study different slip outcomes. Specifically, for fall and skate-over, 17 participants were the same; for fall and walk-over, 14 were the same; for non-fall and walk-over, 17 were the same, and for non-fall and skate-over, 15 were the same.

Note: only the results for key factors discussed in the manuscript were showed here. MP denotes mid-proactive phase; LP denotes late-proactive phase; ER denotes early-reactive phase.

| <b>Shank angle in LP</b> | Dependent participants |         | Independent participants |         |
|--------------------------|------------------------|---------|--------------------------|---------|
|                          | Sample size            | p value | Sample size              | p value |
| fall vs skate-over       | 17 vs 17               | <0.001  | 14 vs 17                 | 0.024   |
| fall vs walk-over        | 14 vs 14               | <0.001  | 17 vs 16                 | <0.001  |
| non-fall vs skate-over   | 17 vs 17               | <0.001  | 23 vs 17                 | 0.012   |
| non-fall vs walk-over    | 15 vs 15               | <0.001  | 25 vs 14                 | <0.001  |

| <b>Shank angle in ER</b> | Dependent participants |         | Independent participants |         |
|--------------------------|------------------------|---------|--------------------------|---------|
|                          | Sample size            | p value | Sample size              | p value |
| fall vs skate-over       | 17 vs 17               | <0.001  | 14 vs 17                 | <0.001  |
| fall vs walk-over        | 14 vs 14               | <0.001  | 17 vs 16                 | <0.001  |
| non-fall vs skate-over   | 17 vs 17               | <0.001  | 23 vs 17                 | <0.001  |
| non-fall vs walk-over    | 15 vs 15               | <0.001  | 25 vs 14                 | <0.001  |

| <b>Knee moment in MP</b> | Dependent participants |         | Independent participants |         |
|--------------------------|------------------------|---------|--------------------------|---------|
|                          | Sample size            | p value | Sample size              | p value |
| fall vs skate-over       | 17 vs 17               | <0.001  | 14 vs 17                 | 0.031   |
| fall vs walk-over        | 14 vs 14               | 0.002   | 17 vs 16                 | <0.001  |
| non-fall vs skate-over   | 17 vs 17               | <0.001  | 23 vs 17                 | 0.002   |
| non-fall vs walk-over    | 15 vs 15               | 0.001   | 25 vs 14                 | <0.001  |

| <b>Ankle moment in ER</b> | Dependent participants |         | Independent participants |         |
|---------------------------|------------------------|---------|--------------------------|---------|
|                           | Sample size            | p value | Sample size              | p value |
| fall vs skate-over        | 17 vs 17               | <0.001  | 14 vs 17                 | 0.006   |
| fall vs walk-over         | 14 vs 14               | <0.001  | 17 vs 16                 | <0.001  |
| non-fall vs skate-over    | 17 vs 17               | <0.001  | 23 vs 17                 | 0.017   |
| non-fall vs walk-over     | 15 vs 15               | 0.011   | 25 vs 14                 | <0.001  |
